1

2

3

4 **Can early assessment of hand grip strength in elderly hip fracture patients predict**  
5 **functional outcome?**

6

7 Ivan Selakovic<sup>1\*</sup>¶, Emilija Dubljanin-Raspopovic<sup>1,2</sup>¶, Ljiljana Markovic-Denic<sup>2,3</sup>¶, Vuk Marusic<sup>2,3</sup>¶, Andja Cirkovic<sup>2,4</sup>&, Marko  
8 Kadija<sup>2,5</sup>&, Sanja Tomanovic-Vujadinovic<sup>1,2</sup>&, Goran Tulic<sup>2,5</sup>&

9

10

11 <sup>1</sup>Clinic for Physical Medicine and Rehabilitation, Clinical Center of Serbia, Belgrade, Serbia

12 <sup>2</sup> Faculty of Medicine, University of Belgrade, Belgrade, Serbia

13 <sup>3</sup> Institute of Epidemiology, Faculty of Medicine, University of Belgrade, Belgrade, Serbia

14 <sup>4</sup> Department for Medical Statistics and Informatics, Faculty of Medicine, University of Belgrade, Belgrade, Serbia

15 <sup>5</sup>Institute for Orthopaedic Surgery and Traumatology, Clinical Center of Serbia, Belgrade, Serbia

16

17 \*Ivan Selakovic

18 E-mail: [ivan.selakovic@gmail.com](mailto:ivan.selakovic@gmail.com) (IS)

19

20

21 ¶These authors contributed equally to this work.

22 &These authors also contributed equally to this work.

## 23 **Abstract**

24           Decreased muscle strength is not only a risk factor for hip fracture in elderly patients, but plays a role in recovery of  
25 physical function. Our aim was to assess the role of grip strength measured early after hip fracture, and classified according to the  
26 EWGSOP2 criteria in predicting short- and long-term functional recovery. One hundred ninety-one patients with acute hip fracture  
27 consecutively admitted to an orthopaedic hospital have been selected. A multidimensional geriatric assessment evaluating  
28 sociodemographic variables, cognitive status, functional status and quality of life prior to fracture, as well as perioperative variables  
29 were performed. Follow-ups at 3 and 6 months after surgery were carried out to evaluate functional recovery. Multivariate  
30 regression models were used to assess the predictive role of handgrip strength. The mean age of the participants was  $80.3 \pm 6.8$   
31 years. Thirty-five percent of our patients with clinically relevant hand grip strength weakness were significantly older, more often  
32 female, had a lower BMI, and were of worse physical health. They also had a lower cognitive level, lower Barthel index, and lower  
33 EQ5D scores before fracture. Multivariate regression analysis adjusted for age and gender revealed that hand grip weakness was an  
34 independent predictor of worse functional outcome at 3 and 6 months after hip fracture for both genders and in all age populations.  
35 Our study supports the prognostic role of hand grip strength assessed at hospital admission in patients with hip fracture. Thus,  
36 clinicians should be encouraged to include hand grip assessment in their evaluation of hip fracture patients in the acute setting in  
37 order to optimize treatment of high-risk individuals.

38 **Key words:** hip fracture, hand grip strength, functional recovery, sarcopenia, frailty

39

## 40 **Introduction**

41           Sustaining a hip fracture is considered one of the most fatal fractures for elderly people that leads to impaired function, and  
42 increased morbidity and mortality, and high financial liability. These facts challenge clinicians in identifying patients at risk of  
43 worse outcome early in the course of hip fracture treatment, in order to set realistic rehabilitation goals, optimize perioperative care,  
44 and define optimal rehabilitation strategies in order to reduce devastating outcomes.

45 Functional evaluation in patients with hip fracture is an essential part of multidimensional assessment, and has an important  
46 prognostic value. Muscle weakness is considered a key element of frailty [1] and, increasingly, of sarcopenia [2, 3]. It is believed  
47 that sarcopenia not only enhances fracture risk, but also increases the risk of poor functional outcome after hip fracture [4].  
48 Reduced muscle strength makes it more difficult to regain lost balance and decreases the mechanical loading of the skeleton leading  
49 to reduced adaptive bone remodeling [5, 6]. Hand grip strength (HGS) assessment is an objective measure of overall body muscle  
50 strength and physical function [7, 8], an important measure for frailty [9], and sarcopenia [10, 11]. Various studies have shown the  
51 prognostic value of hand grip strength in patients with hip fracture [12-17]. However, very few have been carried out in the acute  
52 phase [16, 17], but there are no studies which have been carried out using the European Working Group on Sarcopenia in Older  
53 People 2 (EWGSOP2) criteria [3] to define clinically relevant hand grip weakness.

54 The aim of our study was to assess the EWGSOP2 threshold for grip strength assessed at admission to hospital after hip fracture to  
55 predict short- and long-term functional recovery. We hypothesized that levels of grip strength below the EWGSOP 2 thresholds  
56 measured in the first 48h after hip fracture could predict an unfavorable short- and long-term functional outcome.

57

## 58 **Materials and methods**

### 59 **Study design**

60 All adult patients 65 years or older with an acute hip fracture who were admitted consecutively to an university associated  
61 orthopedic hospital in Serbia between March 1st 2017 and February 28th 2018 were enrolled in an open, prospective, observational  
62 cohort study. All patients with pathologic fractures, major concomitant injuries, multiple trauma, malignant diseases, imminent  
63 death as a result of an end-stage disease, inability to walk before fracture, and nonoperative treatment resulting from high surgical  
64 risk were excluded. Furthermore, patients with severe cognitive impairment, as well as patients with hand weakness as a  
65 consequence of previous neurologic disorders or hand injuries also were excluded. During the study period, 551 patients had hip  
66 fractures and were examined for eligibility. One hundred ninety-one patients were confirmed eligible and were included in the  
67 study. All patients gave written informed consent to participate in the study. The study was conducted according to the Helsinki  
68 Declaration and approved by the University's institutional review board.

## 69 **Measures**

### 70 **Baseline evaluation**

71 We assessed all subjects through standardized patient interview with respect to sociodemographic variables (age, sex,  
72 marital status, preinjury living conditions), cognitive level, handgrip strength, prefracture functional level, and health related quality  
73 of life within 24h of admission. We also recorded perioperative variables during the primary hospital stay, such as comorbidity  
74 level, waiting time for surgery, type of fracture, surgical method, type of anesthesia, and presence of postoperative complications,  
75 and length of stay (LOS).

76 Cognitive level was assessed with the Short Portable Mental Status Questionnaire (SPMSQ) [18]. The 10-item questionnaire  
77 classifies the patient's cognitive level depending on the number of correct answers as lucid (8–10), mild to moderate cognitive  
78 dysfunction (3–7), and severe cognitive dysfunction (0–2). Handgrip strength was measured using a JAMAR hand dynamometer  
79 (Model BK-7498, Fed Sammons Inc, Brookfield, III). Patients were in the supine position, and encouraged to exhibit the greatest  
80 possible force [19]. The best recorded of 3 attempts of maximal voluntary contraction performed at 1-minute intervals of the  
81 dominant hand was considered for analysis. Hand grip strength measurements less than 16 kg in women and 27 kg in men were  
82 considered cut-points for the diagnosis of sarcopenia according to the revised EWGSOP2 criteria [3]. The pre-fracture functional  
83 status 2 weeks before hospital admission was assessed by the Barthel index [20]. The Barthel index measures performance in basic  
84 activities of daily living; its score ranges from 0 (total dependence) to 100 (total independence) [21]. General health related quality

85 of life was measured with the EQ5D scale, which consists of a five-level response for five domains related to daily activities,  
86 mobility, self-care, usual activities, pain and discomfort, anxiety and depression [22]. Responses to the health status classification  
87 system are converted into an overall score using a published utility algorithm for the UK population [23].

88 We used the Charlson comorbidity index (CCI) to categorize comorbidities [24]. Patients were divided into three groups:  
89 without and mild, with CCI scores of 1–2; moderate, with CCI scores of 3–4; and severe, with CCI scores  $\geq 5$ .

90 All patients with femoral neck fractures (84 patients (43.9%)) underwent bipolar hemiarthroplasty, whereas all patients with  
91 intertrochanteric (92 patients (48.2%)) and subtrochanteric fractures (15 patients (7.9%)) underwent open reduction and internal  
92 fixation (ORIF). In all patient early assisted ambulation was encouraged on the first postoperative day with weightbearing as  
93 tolerated, and all patients followed a standardized postoperative rehabilitation program.

## 94 **Outcomes**

95 Functional status after 3 and 6 months was evaluated using the Barthel index score. The information was collected by phone  
96 interview. Data from patients who died or were lost before the first and second follow-up respectively were excluded from the  
97 study. For the analysis of Barthel index 3 months postoperatively the sample size included 160 patient (22 (11.5%) died; 9 (4.7%)  
98 were lost to follow-up). Analysis of outcomes six months after the fracture was performed on 154 patients (27 (14.1%) died, 10  
99 (5.3%) were lost to follow-up).

## 100 **Statistical analysis**

101 Continuous variables are presented in terms of mean values with SD or median and interquartile range depending on  
102 Kolmogorov-Smirnov test of distribution normality. Categorical values are summarized as absolute frequencies and percentages.  
103 To compare patients with two different categories of grip strength a *t* test was performed for the continuous variables and a Mann-  
104 Whitney U test for ordinal variables.

105 In order to detect potential and independent predictors of recovery expressed as Barthel index scores after 3 and 6 months,  
106 univariate and then multivariate linear regression with collinearity diagnostic (VIF method used; variables with VIF > 4 were  
107 excluded from multivariate models) was used. Both multivariate models were adjusted for age and gender.

108 The significance level for all statistical tests was set at 0.05. All analyses were performed using the SPSS Inc. Released  
109 2008. SPSS Statistics for Windows, Version 17.0. Chicago: SPSS Inc.

110

## 111 **Results**

112 Our cohort consisted of 191 patients aged 66 to 97 years. The mean age was 80.3 ±6.8 years, and 77.0% of our cohort were  
113 women. The mean HGS in our cohort was 20.5 ±6.8 kg. Sixty-six (34.6%) patients had clinically relevant hand grip weakness.  
114 Those patients were significantly older, more often female, had a lower BMI, and were of worse physical health. They also had a



115 lower cognitive level, lower Barthel index scores and lower EQ5D scores before fracture. Patients with weaker grip strength were  
 116 more often operated in general anesthesia (Table 1).

117

118 **TABLE 1. Socio-demographic and baseline pre- and perioperative characteristics of the participants**

|                         | <b>Women With HGS &lt; 16 kg</b><br><br><b>Men With HGS &lt; 27 kg</b><br><br><b>N=66 (34.6%)</b> | <b>Women With HGS ≥ 16 kg</b><br><br><b>Men With HGS ≥ 27kg</b><br><br><b>N=125 (65.4%)</b> | <b>p</b> |
|-------------------------|---------------------------------------------------------------------------------------------------|---------------------------------------------------------------------------------------------|----------|
| <b>Age (year)*</b>      | 83.53 ± 6.16                                                                                      | 78.52 ± 6.50                                                                                | <0.001   |
| <b>Gender**</b>         |                                                                                                   |                                                                                             |          |
| Male                    | 21 (31.8%)                                                                                        | 23 (18.4%)                                                                                  | 0.036    |
| Female                  | 45 (68.2%)                                                                                        | 102 (81.6%)                                                                                 |          |
| <b>Marital status**</b> |                                                                                                   |                                                                                             |          |
| Other                   | 40 (61.5%)                                                                                        | 76 (61.8%)                                                                                  | 0.973    |

|                               |              |              |        |
|-------------------------------|--------------|--------------|--------|
| Married                       | 25 (38.5%)   | 47 (38.2%)   |        |
| <b>Pre-injury residence**</b> |              |              |        |
| Home (live alone)             | 14 (21.2%)   | 31 (24.8%)   | 0.710  |
| Home (live with family)       | 50 (75.8%)   | 92 (73.6%)   |        |
| Institution                   | 2 (3.0%)     | 2 (1.6%)     |        |
| <b>BMI*</b>                   | 23.82 ± 4.77 | 25.60 ± 3.91 | 0.008  |
| <b>CCI groups**</b>           |              |              |        |
| No comorbidity/mild           | 21 (31.8%)   | 68 (54.4%)   | 0.009  |
| Moderate                      | 36 (54.6%)   | 42 (33.6%)   |        |
| Severe                        | 9 (13.6%)    | 15 (12.0%)   |        |
| <b>SPMSQ*</b>                 | 6.79 ± 1.67  | 7.83 ± 1.63  | <0.001 |
| <b>EQ5D before fracture*</b>  | 0.73 ± 0.17  | 0.83 ± 0.14  | <0.001 |

|                                          |              |              |       |
|------------------------------------------|--------------|--------------|-------|
| <b>Barthel index before fracture*</b>    | 92.95 ± 7.70 | 96.16 ± 5.54 | 0.003 |
| <b>Type of fracture**</b>                |              |              |       |
| Femoral neck                             | 25 (37.9%)   | 59 (47.2%)   | 0.462 |
| Intertrochanteric                        | 35 (53.0%)   | 57 (45.6%)   |       |
| Subtrochanteric                          | 6 (9.1%)     | 9 (7.2%)     |       |
| <b>Time from admission to operation*</b> | 6.26 ± 3.17  | 5.75 ± 2.98  | 0.277 |
| <b>Lenght of hospital stay*</b>          | 15.91 ± 5.20 | 16.03 ± 4.42 | 0.864 |
| <b>Surgical procedure**</b>              |              |              |       |
| Arthroplasty                             | 27 (36.4%)   | 57 (45.6%)   | 0.219 |

|                                 |                |                |       |
|---------------------------------|----------------|----------------|-------|
| ORIF                            | 39 (63.6%)     | 68 (54.4%)     |       |
| <b>Type of anaesthesia**</b>    |                |                |       |
| General                         | 51 (79.7%)     | 78 (64.5%)     | 0.032 |
| Regional                        | 13 (20.3%)     | 43 (35.5%)     |       |
| <b>Duration of anaesthesia*</b> | 118.47 ± 39.54 | 114.70 ± 27.18 | 0.504 |
| <b>Complications**</b>          |                |                |       |
| Yes                             | 18 (27.3%)     | 30 (24.0%)     | 0.620 |
| No                              | 48 (72.7%)     | 95 (76.0%)     |       |

119 \*Values are given as the mean with the standard deviation in parentheses

120 \*\* Values are given as the number of patients with the percentage in parentheses

121 RR - relative risk; BMI - body mass index; CCI - Charlson Comorbidity Index; SPMSQ - Short Portable Mental Status

122 Questionnaire; HGS - Handgrip strength

123

124 Patients with relevant hand grip weakness achieved statistically significant lower Barthel index scores 3 (56.30  $\pm$ 25.87 vs.  
125 75.77  $\pm$ 21.49) (Table 2) and 6 months (67.77  $\pm$ 29.15 vs. 87.66  $\pm$ 19.30) (Table 3) after hip fracture. Adjusted multivariate regression  
126 analysis revealed that hand grip strength below the cutoff point for sarcopenia according to the EWGSOP2 was an independent  
127 predictor of worse functional outcome at 3 and 6 months after hip fracture for both genders and in all age populations.

128

129 **TABLE 2. Univariate and Multivariate analysis for variables significantly associated with Barthel index scores 3 months**  
130 **after fracture**

| Predictors                 | Univariate analysis    |         | Multivariate analysis  |         |
|----------------------------|------------------------|---------|------------------------|---------|
|                            | B (95% CI)             | p value | B (95% CI)             | p value |
| <b>Marital status</b>      | -0.05 (-11.04 – 5.71)  | 0.531   |                        |         |
| <b>Preinjury residence</b> | -0.18 (-17.22 - -1.41) | 0.021   | -0.13 (-13.29 - -0.34) | 0.039   |
| <b>BMI</b>                 | 0.02 (-0.79 – 1.08)    | 0.761   |                        |         |
| <b>CCI</b>                 | -0.29 (-15.40 - -5.24) | <0.001  | -0.10 (-8.12 – 1.06)   | 0.131   |

|                                         |                        |        |                        |        |
|-----------------------------------------|------------------------|--------|------------------------|--------|
| <b>SPMSQ</b>                            | 0.27 (1.72 – 5.97)     | <0.001 | 0.72 (-0.92 – 2.94)    | 0.302  |
| <b>EQ5D before fracture</b>             | 0.31 (25.94 – 71.55)   | <0.001 | 0.16 (2.10 – 46.10)    | 0.032  |
| <b>Barthel index before fracture</b>    | 0.51 (1.37 – 2.30)     | <0.001 | 0.36 (0.77 – 1.71)     | <0.001 |
| <b>HGS</b>                              | 0.31 (8.29 – 24.51)    | <0.001 | 0.185 (2.29 – 16.71)   | 0.010  |
| <b>Time from admission to operation</b> | -0.01 (-1.36 – 1.13)   | 0.860  |                        |        |
| <b>Lenght of hospital stay</b>          | -0.04 (-1.04 – 0.62)   | 0.616  |                        |        |
| <b>Type of anaesthesia</b>              | 0.09 (-3.22 – 12.55)   | 0.244  |                        |        |
| <b>Duration of anaesthesia</b>          | -0.21 (-0.31 – 0.05)   | 0.009  | -0.12 (-0.20 – 0.01)   | 0.069  |
| <b>Complications</b>                    | -0.16 (-18.58 - -0.44) | 0.040  | -0.13 (-14.90 - -0.20) | 0.044  |

131 Adjusted for age and gender

132 BMI - body mass index; CCI - Charlson Comorbidity Index; SPMSQ - Short Portable Mental Status Questionnaire; HGS -

133 Handgrip strength

134

135 **TABLE 3. Univariate and Multivariate analysis for variables significantly associated with Barthel index scores 6 months**  
 136 **after fracture**

| Predictors                           | Univariate analysis    |         | Multivariate analysis  |         |
|--------------------------------------|------------------------|---------|------------------------|---------|
|                                      | B (95% CI)             | p value | B RR (95% CI)          | p value |
| <b>Marital status</b>                | -0.12 (-14.75 – 2.56)  | 0.166   |                        |         |
| <b>Preinjury residence</b>           | -0.14 (-15.52 – 1.20)  | 0.093   |                        |         |
| <b>BMI</b>                           | 0.04 (-0.75 – 1.28)    | 0.602   |                        |         |
| <b>CCI</b>                           | -0.31 (-16.61 - -5.58) | <0.001  | -0.17 (-10.99 - -1.03) | 0.018   |
| <b>SPMSQ</b>                         | 0.29 (1.84 – 6.30)     | <0.001  | 0.09 (-0.76 – 3.26)    | 0.222   |
| <b>EQ5D before fracture</b>          | 0.36 (32.11 – 78.99)   | <0.001  | 0.15 (-0.28 – 45.56)   | 0.053   |
| <b>Barthel index before fracture</b> | 0.53 (1.47 – 2.48)     | <0.001  | 0.38 (0.86 – 1.91)     | <0.001  |



|                                         |                       |        |                      |       |
|-----------------------------------------|-----------------------|--------|----------------------|-------|
| <b>HGS</b>                              | 0.36 (10.39 – 27.18)  | <0.001 | 0.21 (3.07 – 18.37)  | 0.006 |
| <b>Time from admission to operation</b> | -0.07 (-1.87 – 0.74)  | 0.392  |                      |       |
| <b>Length of hospital stay</b>          | 0.01 (-0.83 – 0.94)   | 0.895  |                      |       |
| <b>Type of anaesthesia</b>              | 0.08 (-4.19 – 12.28)  | 0.333  |                      |       |
| <b>Duration of anaesthesia</b>          | -0.17 (-0.28 – -0.01) | 0.037  | -0.08 (-0.17 – 0.05) | 0.250 |
| <b>Complications</b>                    | -0.07 (-14.06 – 5.82) | 0.414  |                      |       |

137 Adjusted for age and gender

138 BMI - body mass index; CCI - Charlson Comorbidity Index; SPMSQ - Short Portable Mental Status Questionnaire; HGS -

139 Handgrip strength

140

141 Besides hand grip strength. living at home, better quality of life and higher functionally independence before fracture, as

142 well as absence of complications during the hospitalization period were independent predictors of Barthel index scores 3 months

143 postoperatively (Table 2). Multivariate regression analysis showed that, besides hand grip strength above cutoff values for  
144 sarcopenia, lower CCI index and higher Barthel index scores before fracture were independent predictors of higher Barthel index  
145 scores 6 months after fracture (Table 3).

146

## 147 **Discussion**

148 Our study demonstrates that hip fracture patients with a validated threshold for clinical weak grip strength assessed at an  
149 early stage had significantly poorer functional recovery after 3 and 6 months compared to patients with a grip strength above the  
150 cutoff points. Furthermore, our findings provide evidence that hand grip strength along with several other prognostic factors  
151 traditionally considered in clinical practice can independently predict short- and long-term functional outcome [25]. Within the  
152 study 35% of the study population had relevant clinical weakness based on hand grip strength. Older age, higher level of  
153 comorbidity, lower cognitive level, lower functional level, and worse quality of life recognized at admission indicate clearly a  
154 decline of reserve and function across multiple physiological systems in this group of patients.

155 The results of our investigation are consistent with data from previous studies confirming the prognostic role of handgrip  
156 strength [12-17]. However, it is not easy to compare present results with other studies addressing this subject. First, handgrip  
157 strength was assessed at various time points in different studies. There are only two studies evaluating the prognostic value of  
158 handgrip strength measured in the acute setting [16, 17]. Savino et al. showed that handgrip strength measured at hospital admission

159 significantly predicted walking recovery 12 months after hip [16]. Alvarez MN et al. concluded that HGS assessed in the first hours  
160 after hospital admission for hip fracture surgery is an indicator of functional recovery after three months [17]. It is well known that  
161 muscle mass is maintained during the first 10 days, although it subsequently diminishes [26, 27]. Consequently, it is reasonable to  
162 assume that measuring HGS early after hip fracture is an appropriate time to assess function. Second, a small body of literature used  
163 cutoff points to define clinical relevant weakness based on HGS [15, 17, 28], and no study applied the EWGSOP2 criteria. Alvarez  
164 MN et al. [17] who used the EWGSOP criteria [11], and di Monaco et al. [15] who used the FNIH Sarcopenia Project criteria for  
165 HGS categorization [29] confirmed the prognostic role of hand grip strength. In contrast, Steihaug et al. who applied the EWGSOP  
166 criteria to investigate the impact of HGS early after fracture were the only ones who found no association between grip strength and  
167 short- and long-term functional outcome [28]. This is the only study to deny the value of HGS in predicting functional outcome in  
168 hip fracture patients. It has to be taken into account that although the definition of „weakness“ according to the FNIH , and the  
169 EWGSOP criteria correspond very closely to the one defined by the EWGSOP2 [3], it is not the same. Moreover, our results  
170 cannot be compared completely to those published by de Monaco et al., because they reported their results only on women, and in  
171 the postacute rehabilitation setting [13, 15].

172         There are several strengths of our study. First, to the best of our knowledge this is the first study to assess HGS using the  
173 EWGSOP2 criteria. Second, our study proves the prognostic value of HGS in the acute setting for both gender and all ages. Most  
174 studies who analyzed the predictive role of hand grip strength reported their results only in women with hip fracture [12, 13, 15].

175 There are also some limitations to our study. First, the outcome of our study was assessed with only self-reported information  
176 collected by phone interviews. Second, patients were collected only from one single center. Additionally, there are other  
177 confounding factors that could have been studied, for example nutritional status and vitamin D status.

178 Our results have two clinical implications. First, assessment of HGS can be used to identify hip fracture patients at high risk  
179 for poor functional outcome at an early time point. Second, it is well known that functional evaluation is hard to assess in acute hip  
180 fracture patients. In the first place, gait speed cannot be assessed before surgery. Thus, functional evaluation is limited to measuring  
181 muscle strength. Confirmation of the prognostic value of HGS assessed in the acute setting is therefore very significant. Third,  
182 muscle weakness is a modifiable risk factor that can be improved. It is well known that strengthening exercises had favorable effects  
183 on various outcomes after hip fracture [30]. Therefore, future studies should reveal if patients with clinically defined weakness who  
184 sustain a hip fracture could benefit from interventions to improve muscle strength, function, and outcomes.

185 Our study has identified HGS assessed in the acute setting as potential prognostic predictor of functional outcome in  
186 patients with hip fracture. Hand grip strength is an accessible, cost effective, and simple objective measure of physical function for  
187 bedridden patients. Thus, clinicians should be encouraged to include hand grip assessment in their evaluation of hip fracture  
188 patients at admission to the acute setting in order to optimize prognostic counseling and treatment of high-risk individuals. Further  
189 studies are needed to investigate the relevance of early introduction of resisting exercise programs in patients hip fracture patients  
190 with relevant low muscle strength.

191

## 192 **Acknowledgments**

193           This study is conducted as the part of project No 175046 funded by Ministry of Education, Science and Technological  
194 Development, Republic of Serbia, 2011-2020.

195

## 196      **References**

- 197      1. Bandeen-Roche K, Xue QL, Ferrucci L, Walston J, Guralnik JM, Chaves P, et al. Phenotype of frailty: characterization in the  
198      women's health and aging studies. *J Gerontol A Biol Sci Med Sci*. 2006 Mar;61(3):262-6.
- 199      2. Fielding RA, Vellas B, Evans WJ, Bhasin S, Morley JE, Newman AB, et al. Sarcopenia: an undiagnosed condition in older  
200      adults. Current consensus definition: prevalence, etiology, and consequences. International working group on sarcopenia. *J*  
201      *Am Med Dir Assoc*. 2011 May;12(4):249-56.
- 202      3. Cruz-Jentoft AJ, Bahat G, Bauer J, Boirie Y, Bruyère O, Cederholm T, et al. Sarcopenia: revised European consensus on  
203      definition and diagnosis. *Age Ageing*. 2019 Jan 1;48(1):16-31.
- 204      4. Landi F, Calvani R, Ortolani E, Salini S, Martone AM, Santoro L, et al. The association between sarcopenia and functional  
205      outcomes among older patients with hip fracture undergoing in-hospital rehabilitation. *Osteoporos Int*. 2017  
206      May;28(5):1569-1576.
- 207      5. He H, Liu Y, Tian Q, Papasian CJ, Hu T, Deng HW. Relationship of sarcopenia and body composition with osteoporosis.  
208      *Osteoporos Int*. 2016 Feb;27(2):473-82.
- 209      6. Benichou O, Lord SR. Rationale for Strengthening Muscle to Prevent Falls and Fractures: A Review of the Evidence. *Calcif*  
210      *Tissue Int*. 2016 Jun;98(6):531-45.

- 211 7. Hirschfeld HP, Kinsella R, Duque G. Osteosarcopenia: where bone, muscle, and fat collide. *Osteoporos Int.* 2017  
212 Oct;28(10):2781-2790.
- 213 8. Rantanen T, Volpato S, Ferrucci L, Heikkinen E, Fried LP, Guralnik JM. Handgrip strength and cause-specific and total  
214 mortality in older disabled women: exploring the mechanism. *J Am Geriatr Soc.* 2003 May;51(5):636-41.
- 215 9. Syddall H, Cooper C, Martin F, Briggs R, Aihie Sayer A. Is grip strength a useful single marker of frailty? *Age Ageing.* 2003  
216 Nov;32(6):650-6.
- 217 10. Chen LK, Liu LK, Woo J, Assantachai P, Auyeung TW, Bahyah KS, et al. Sarcopenia in Asia: consensus report of the Asian  
218 Working Group for Sarcopenia. *J Am Med Dir Assoc.* 2014 Feb;15(2):95-101.
- 219 11. Cruz-Jentoft AJ, Baeyens JP, Bauer JM, Boirie Y, Cederholm T, Landi F, et al. Sarcopenia: European consensus on  
220 definition and diagnosis: Report of the European Working Group on Sarcopenia in Older People. *Age Ageing.* 2010  
221 Jul;39(4):412-23.
- 222 12. Wehren LE, Hawkes WG, Hebel JR, Orwig DL, Magaziner J. Bone mineral density, soft tissue body composition, strength,  
223 and functioning after hip fracture. *J Gerontol A Biol Sci Med Sci.* 2005 Jan;60(1):80-4.
- 224 13. Di Monaco M, Castiglioni C, De Toma E, Gardin L, Giordano S, Di Monaco R, et al. Handgrip strength but not appendicular  
225 lean mass is an independent predictor of functional outcome in hip-fracture women: a short-term prospective study. *Arch*  
226 *Phys Med Rehabil.* 2014 Sep;95(9):1719-24.

- 227 14. Beloosesky Y, Weiss A, Manasian M, Salai M. Handgrip strength of the elderly after hip fracture repair correlates with  
228 functional outcome. *Disabil Rehabil.* 2010;32(5):367-73.
- 229 15. Di Monaco M, Castiglioni C. Weakness and Low Lean Mass in Women With Hip Fracture: Prevalence According to the  
230 FNIH Criteria and Association With the Short-Term Functional Recovery. *J Geriatr Phys Ther.* 2017 Apr/Jun;40(2):80-85.
- 231 16. Savino E, Martini E, Lauretani F, Pioli G, Zagatti AM, Frondini C, et al. Handgrip strength predicts persistent walking  
232 recovery after hip fracture surgery. *Am J Med.* 2013 Dec;126(12):1068-75.e1.
- 233 17. Alvarez MN, Bonnardeaux P L.D, Thuissard IJ, Sanz-Rosa D, Muñana EA, Galindo RB, et al. Grip strength and functional  
234 recovery after hip fracture: An observational study in elderly population. *Eur Geriatr Med.* 2016 Dec 1;7(6):556-60.
- 235 18. Pfeiffer E. A short portable mental status questionnaire for the assessment of organic brain deficit in elderly patients. *J Am*  
236 *Geriatr Soc.* 1975 Oct;23(10):433-41.
- 237 19. Richards LG. Posture effects on grip strength. *Arch Phys Med Rehabil.* 1997 Oct;78(10):1154-6.
- 238 20. Katz S, Ford AB, Moskowitz RW, Jackson BA, Jaffe MW. Studies of Illness in the Aged. The Index of ADL: A  
239 Standardized Measure of Biological and Psychological Function. *JAMA.* 1963 Sep 21;185:914-9.
- 240 21. Mahoney FI, Barthel D. Functional evaluation: The Barthel Index. *Md State Med J.* 1965 Feb;14:61-5.
- 241 22. Brooks R. EuroQol: the current state of play. *Health Policy.* 1996 Jul;37(1):53-72.
- 242 23. Dolan P. Modeling valuations for EuroQol health states. *Med Care.* 1997 Nov;35(11):1095-108.



- 243 24. Charlson ME, Pompei P, Ales KL, MacKenzie CR. A new method of classifying prognostic comorbidity in longitudinal  
244 studies: development and validation. *J Chronic Dis.* 1987;40(5):373-83.
- 245 25. Kristensen MT. Factors affecting functional prognosis of patients with hip fracture. *Eur J Phys Rehabil Med.* 2011  
246 Jun;47(2):257-64.
- 247 26. D'Adamo CR, Hawkes WG, Miller RR, Jones M, Hochberg M, Yu-Yahiro J, et al. Short-term changes in body composition  
248 after surgical repair of hip fracture. *Age Ageing.* 2014 Mar;43(2):275-80.
- 249 27. Fox KM, Magaziner J, Hawkes WG, Yu-Yahiro J, Hebel JR, Zimmerman SI, et al. Loss of bone density and lean body mass  
250 after hip fracture. *Osteoporos Int.* 2000;11(1):31-5.
- 251 28. Steihaug OM, Gjesdal CG, Bogen B, Kristoffersen MH, Lien G, Ranhoff AH. Sarcopenia in patients with hip fracture: A  
252 multicenter cross-sectional study. *PLoS One.* 2017 Sep 13;12(9):e0184780.
- 253 29. Alley DE, Shardell MD, Peters KW, McLean RR, Dam TT, Kenny AM, et al. Grip strength cutpoints for the identification of  
254 clinically relevant weakness. *J Gerontol A Biol Sci Med Sci.* 2014 May;69(5):559-66.
- 255 30. Lee SY, Yoon BH, Beom J, Ha YC, Lim JY. Effect of Lower-Limb Progressive Resistance Exercise After Hip Fracture  
256 Surgery: A Systematic Review and Meta-Analysis of Randomized Controlled Studies. *J Am Med Dir Assoc.* 2017 Dec  
257 1;18(12):1096.e19-1096.e26.
- 258
